# Supplementary material for: A sensitive and ratiometric fluorescent probe for imaging cytosolic H2S generation
Source: Royal Society of Chemistry journal article supplement (doi:10.1039/d2nj04533h), 2022-01-01
Supplement: d2nj04533h1.pdf [file d2nj04533h1.pdf]

## Supporting Information

### A Sensitive and Ratiometric Fluorescent Probe for Imaging

#### Cytosolic H<sub>2</sub>S Generation

Yuming Zhang,<sup>a,b</sup> Yuncong Chen,<sup>\*b</sup> Xiangchao Shi,<sup>b</sup> Yang Bai,<sup>b</sup> Weijiang He,<sup>\*b</sup> Zijian Guo<sup>b</sup>

a. School of Chemistry and Chemical Engineering, Nantong University, Nantong 226300, P. R. China.

b. State Key Laboratory of Coordination Chemistry, School of Chemistry and Chemical Engineering, Chemistry and Biomedicine Innovation Center (ChemBIC), Nanjing University, Nanjing 210023, P. R. China.

#### 1. Materials and general methods

All reagents and solvents were purchased from commercial source including J&K chemical, Energy Chemical, Inno-chem, and Alfa Aesar, which were of analytic grade and used without purification. MTR 633 was purchased from Invitrogen. MEM media was purchased from Jiangsu Keygen BioTech Co. Ltd. <sup>1</sup>H NMR and <sup>13</sup>C NMR spectra were collected on Bruker DRX-400. HR-MS data were collected on Agilent 6540Q-TOF LC/MS mass spectrometer, and ESI-MS data were collected on Thermo Fisher ESI Mass Spectrometer. Fluorescent spectra were collected on FluoroMax-4 Spectrofluorometer with 5 nm slit for both excitation and emission. Absorption spectra were accomplished on Perkin Elmer Lambda 35 spectrophotometer. pH measurements were accomplished by a Model PHS-3C meter. Cellular confocal imaging was realized on confocal microscope Zeiss LSM710.

#### 2. Synthesis and characterization of CouMa

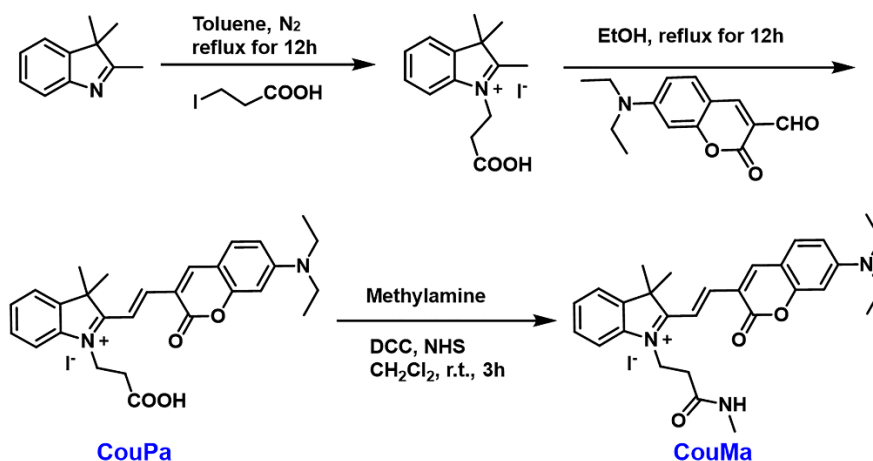

Scheme S1. Synthesis route of CouMa.

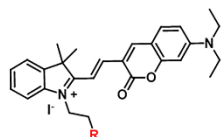

| probe | R group | ClogP | subcellular distribution | Pearson's correlation coefficient with MTR | Reference    |
|-------|---------|-------|--------------------------|--------------------------------------------|--------------|
| CouPa |         | 2.67  | mitochondria             | 0.84(MCF-7)                                | 30           |
| CouMa |         | 5.79  | cytosol                  | 0.49 (MCF-7)                               | this article |
| CouDE |         | 7.12  | mitochondria             | 0.85 (MCF-7), 0.75 (Hep3B)                 | 30           |
| CouDa |         | 11.61 | mitochondria             | 0.84 (MCF-7)                               | 32           |

**Table S1.** Information about derivative probes of CouPa.

### Synthesis of probe CouMa

CouPa was obtained according to the procedure reported previously<sup>1</sup>. CouPa (1.92 mM, 1.126 g), DCC (1.92 mM, 0.396g) and NHS (1.92 mM, 0.221 g) were dissolved in CH<sub>2</sub>Cl<sub>2</sub> (40 mL) and activated under 0°C for 0.5 h. After that methylamine (2.3 mM, 2 M in THF) was added and the solution was stirred at room temperature for nearly 3 h, which was monitored by TLC. When the reaction was finished, cool the solution under 4°C overnight and remove the precipitate by filtration. Solvent of filtrate was removed under reduced pressure, and the crude product was purified by silica gel chromatography with eluent CH<sub>2</sub>Cl<sub>2</sub>/CH<sub>3</sub>OH (1/20, v/v) to afford CouMa as a dark blue solid. Yield, 65%.

<sup>1</sup>H NMR (400 MHz, CD<sub>3</sub>OD,  $\delta$ , ppm): 8.65 (s, 1H), 8.33 (d, 1H,  $J = 15.7$ Hz), 7.95 (d, 1H,  $J = 15.6$  Hz), 7.76-7.70 (m, 2H), 7.63-7.55 (m, 3H), 6.90 (d, 1H,  $J = 9.1$  Hz), 6.61 (s, 1H), 4.79 (t, 2H,  $J = 6.6$  Hz), 3.61 (q, 4H,  $J = 7.1$  Hz), 2.86 (t, 2H,  $J = 6.7$  Hz), 2.59 (s, 3H), 1.82 (s, 6H), 1.26(t, 6H,  $J = 7.1$  Hz). <sup>13</sup>C NMR (101 MHz, CD<sub>3</sub>OD,  $\delta$ , ppm): 183.42, 171.76, 169.12, 161.66, 159.71, 156.27, 151.99, 144.63, 142.21, 133.95, 130.39, 130.06, 123.99, 115.48, 113.82, 112.76, 111.62, 111.04, 97.94, 53.22, 46.58, 44.33, 34.91, 27.33, 26.47, 12.90. HR-MS (positive mode,  $m/z$ ): calcd. 472.2599, found 472.2595 for [M]<sup>+</sup>.

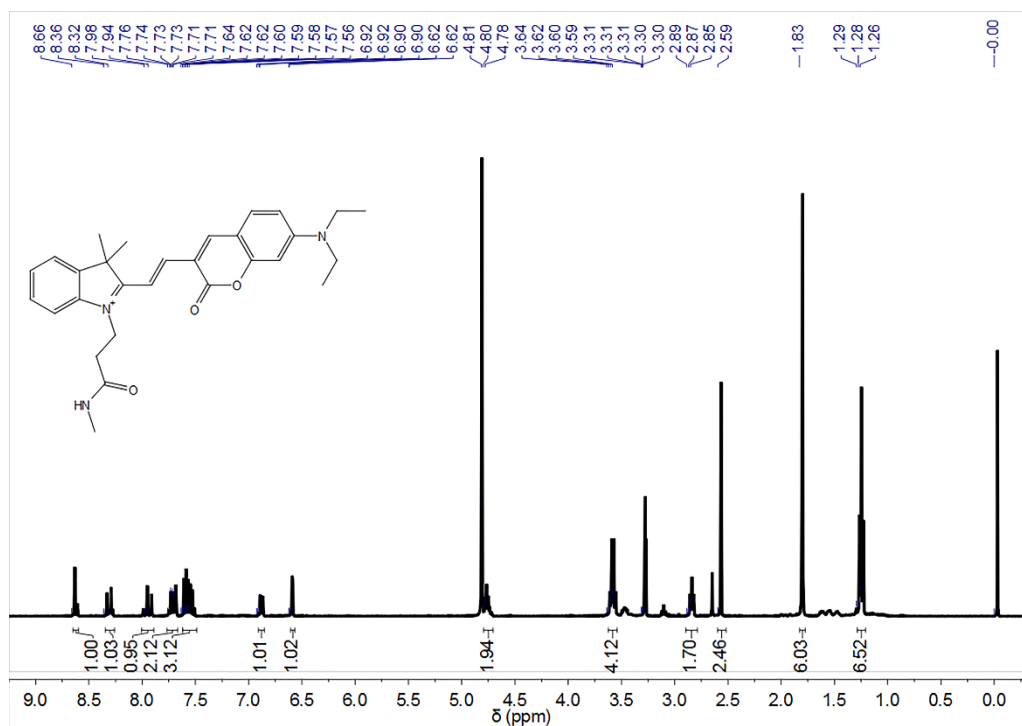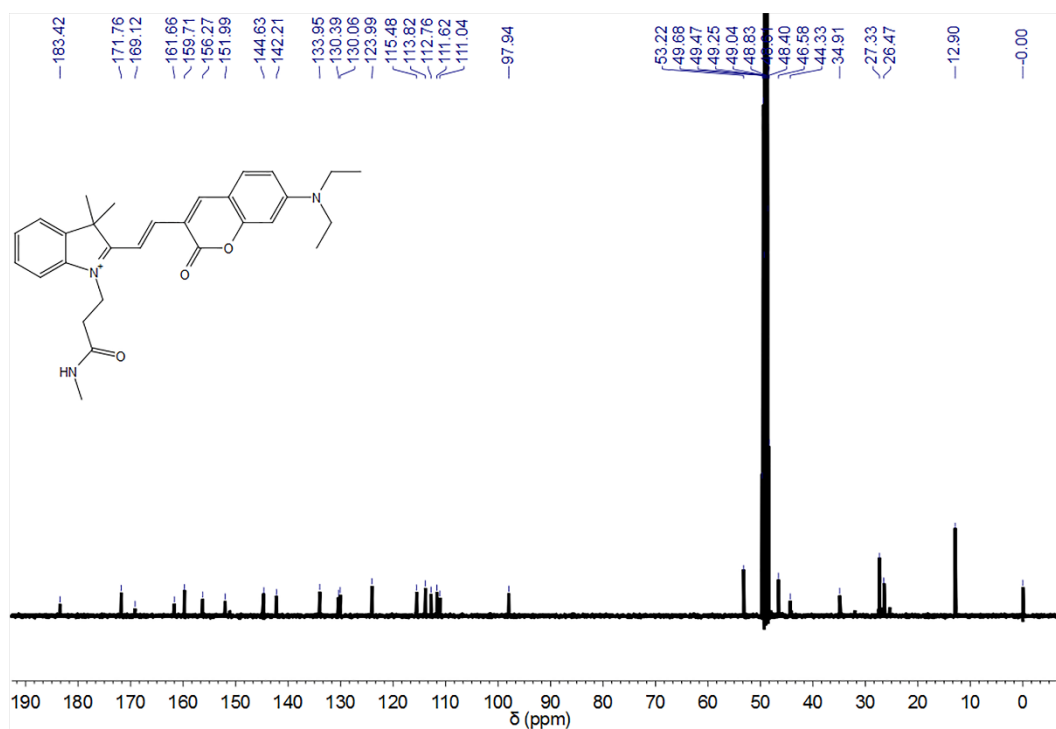

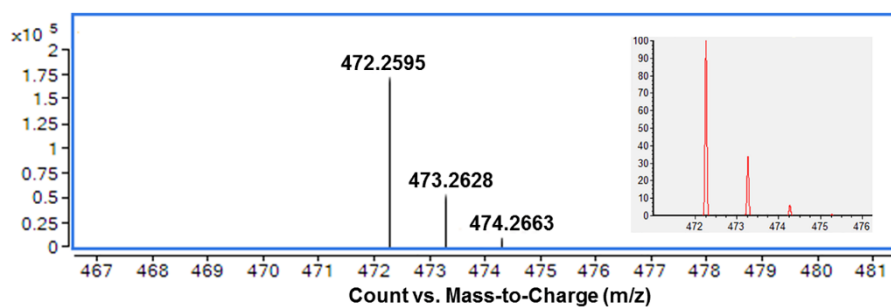

**Figure S3.** HR-MS spectrum of CouMa. Inset, the simulated isotopic distribution pattern of CouMa.

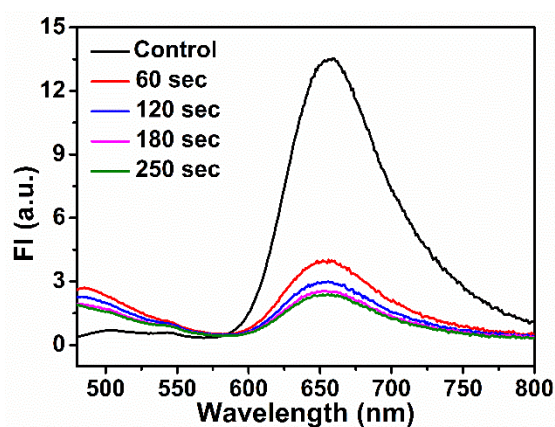

**Figure S4.** Time-dependent fluorescent emission spectra of CouMa (10  $\mu\text{M}$ ) after NaHS (200  $\mu\text{M}$ ) was added in HEPES buffer solution (20 mM, pH 7.4, 10% DMSO, v/v). Spectra of control was emission of CouMa before NaHS was added.

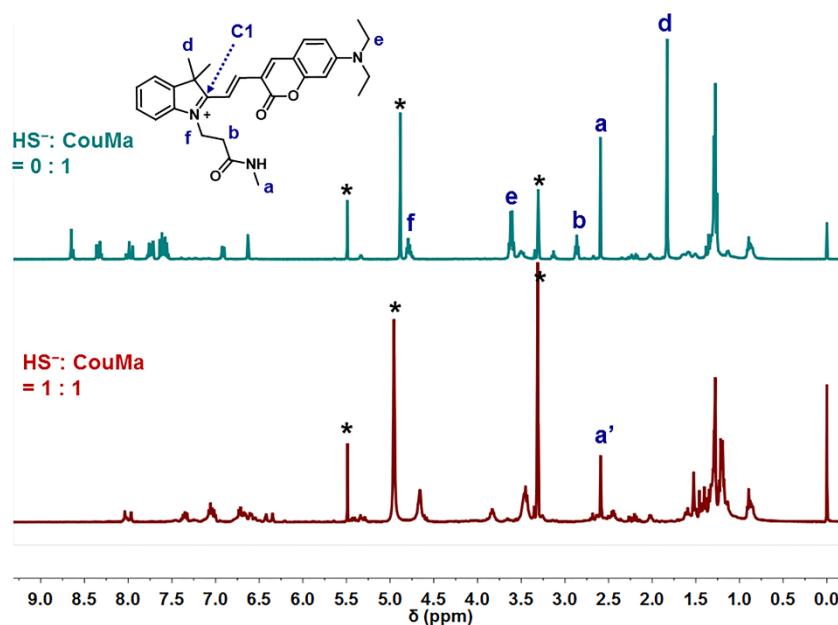

**Figure S5.**  $^1\text{H}$  NMR spectra of CouMa (17 mM) before and after equal amount of NaHS (0.2 M in  $\text{D}_2\text{O}$ ) was added. Signals of solvent (methanol, water or dichloromethane)

were signed by asterisk.

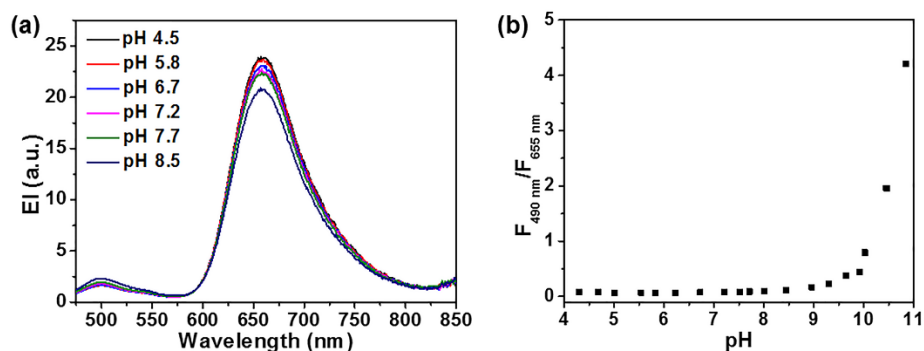

**Figure S6.** (a) Emission spectra of 10  $\mu\text{M}$  CouMa in solutions with different pH. (b) Emission ratio  $F_{490 \text{ nm}}/F_{655 \text{ nm}}$  of CouMa versus pH values. NaOH and HCl were applied to adjust pH of CouMa solution.  $\lambda_{\text{ex}} = 460 \text{ nm}$ .

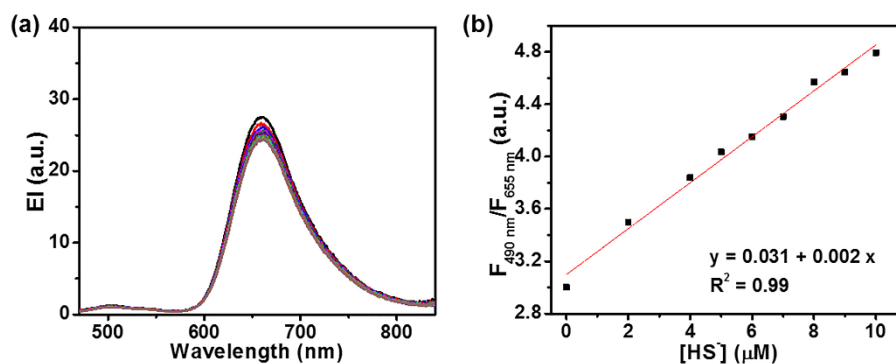

**Figure S7.** (a) Emission spectra of 10  $\mu\text{M}$  CouMa in HEPES buffer (20 mM, pH 7.4, 10% DMSO, v/v) scanned for 20 times. (b) Linear relationship of emission ratio  $F_{490 \text{ nm}}/F_{655 \text{ nm}}$  of 10  $\mu\text{M}$  CouMa versus NaHS concentration (0-10  $\mu\text{M}$ ).  $\lambda_{\text{ex}} = 460 \text{ nm}$ .

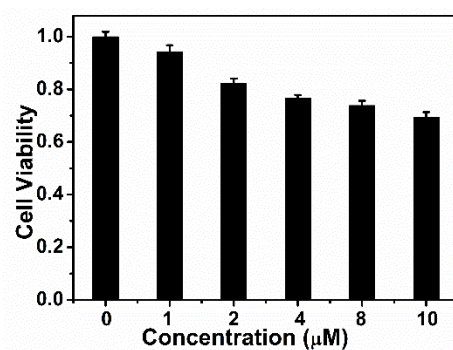

**Figure S8.** Cell viability of MCF-7 cells incubated with CouMa of different concentrations for 12 h.

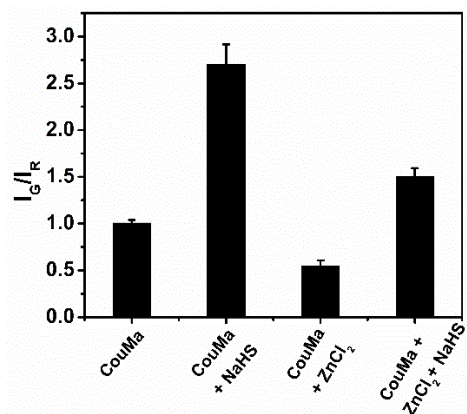

**Figure S9.** Quantification of ratio channel intensity of MCF-7 cells incubated under various circumstances corresponding to Figure 4. n=3.
